# Supplementary material for: Metronomic capecitabine as an immune modulator in glioblastoma patients reduces myeloid-derived suppressor cells
Source: bioRxiv or medRxiv preprint supplement (doi:10.1101/655688), 2019-06-02
Supplement: Supplementary file [file media-1.pdf]

**Supplemental Table 1: Clinical Characteristics of study patients**

|    | Age at Diagnosis                                                                  | Age at Study Enrollment | Sex | KPS at Diagnosis | Location       | Prior Immunotherapy | Prior Chemotherapy | Initial Surgery | Recurrence # | Study Surgery | Study Dose | Progression at Time of Publication | Alive at the Time of Publication | Progression Free Survival | Overall Survival | On Cycle # when stopped | 1p Status | 19q Status | IDH Mutation Status | MGMT Methylation Status | Ki 67 Percent | EGFR Amplification | P53 Percent Reactivity Percent |
|----|-----------------------------------------------------------------------------------|-------------------------|-----|------------------|----------------|---------------------|--------------------|-----------------|--------------|---------------|------------|------------------------------------|----------------------------------|---------------------------|------------------|-------------------------|-----------|------------|---------------------|-------------------------|---------------|--------------------|--------------------------------|
| 1  | 56                                                                                | 57                      | M   | 90               | Right frontal  | No                  | Yes                | Biopsy          | 1            | STR           | 300        | Yes                                | No                               | 5.5                       | 17.5             | 5                       | Loss      | Intact     | Wild Type           | Unmethylated            | 40            | No                 | 10                             |
| 2  | 64                                                                                | 65                      | M   | 80               | Left parietal  | No                  | No                 | NTR             | 1            | NTR           | 150        | Yes                                | No                               | 9.2                       | 14.1             | 10                      | Loss      | Loss       | Wild Type           | Unmethylated            | 70            | Yes                | 25                             |
| 3  | 67                                                                                | 70                      | F   | 90               | Left occipital | Yes                 | No                 | NTR             | 2            | NTR           | 300        | Yes                                | No                               | 1.8                       | 29.7             | 2                       | Intact    | Intact     | Wild Type           | Methylated              | 50            | Yes                | 25                             |
| 4  | 63                                                                                | 64                      | F   | 80               | Left frontal   | Yes                 | No                 | GTR             | 1            | NTR           | 150        | Yes                                | No                               | 5.3                       | 35.4             | 5                       | Intact    | Intact     | Wild Type           | Unmethylated            | 50            | Yes                | 10                             |
| 5  | 38                                                                                | 40                      | F   | 90               | Right frontal  | No                  | Yes                | GTR             | 2            | GTR           | 150        | No                                 | Yes                              | 27.8                      | 36.6             | 30                      | NA        | NA         | Mutated             | Methylated              | 12            | NA                 | 75                             |
| 6  | 58                                                                                | 59                      | M   | 90               | Right temporal | No                  | Yes                | Biopsy          | 2            | NTR           | 300        | Yes                                | No                               | 5.8                       | 22.1             | 6                       | Intact    | Intact     | Wild Type           | Unmethylated            | 40            | Yes                | 5                              |
| 7  | 58                                                                                | 59                      | M   | 80               | Right frontal  | No                  | No                 | NTR             | 1            | GTR           | 150        | Yes                                | No                               | 5.1                       | 14.9             | 4                       | NA        | NA         | Wild Type           | Methylated              | 30            | NA                 | NA                             |
| 8  | Removed from trial after surgical pathology results showed no disease progression |                         |     |                  |                |                     |                    |                 |              |               |            |                                    |                                  |                           |                  |                         |           |            |                     |                         |               |                    |                                |
| 9  | 56                                                                                | 58                      | M   | 90               | Right parietal | No                  | No                 | GTR             | 1            | GTR           | 450        | Yes                                | No                               | 1.8                       | 11.9             | 2                       | Intact    | Intact     | Wild Type           | Unmethylated            | 70            | Yes                | 10                             |
| 10 | 60                                                                                | 61                      | F   | 80               | Left frontal   | Yes                 | Yes                | GTR             | 2            | NTR           | 450        | Yes                                | No                               | 8.5                       | 21.6             | 9                       | Intact    | Intact     | Wild Type           | Methylated              | 9             | No                 | 10                             |
| 11 | 45                                                                                | 46                      | F   | 90               | Left Parietal  | No                  | No                 | GTR             | 1            | STR           | 450        | No                                 | Yes                              | 13.9                      | 22.3             | 14                      | Intact    | Loss       | Wild Type           | Methylated              | 80            | No                 | 5                              |
| 12 | 48                                                                                | 49                      | M   | 90               | Right temporal | No                  | No                 | Laser           | 1            | GTR           | 450        | Yes                                | Yes                              | 6.2                       | 12.9             | 7                       | Intact    | Intact     | Wild Type           | Unmethylated            | 40            | No                 | 20                             |

Abbreviations: M: male; F: female; KPS: Karnofsky Performance Scale; STR: subtotal resection; NTR: near-total resection; GTR: gross-total resection; IDH: isocitrate dehydrogenase; MGMT: O-6-methylguanine-DNA methyltransferase; EGFR: epidermal growth factor receptor

**Supplemental Table 2: Study Calendar**

| Required Assessments        | Pre- study | Pre-op              | Post op (Day 1) | Cycle 1 (Day 1) <sup>1</sup> | Cycle 2+ (Day 1) <sup>1</sup> | End of Treatment | 30-Day Follow up <sup>10</sup> |
|-----------------------------|------------|---------------------|-----------------|------------------------------|-------------------------------|------------------|--------------------------------|
| Informed Consent            | X          |                     |                 |                              |                               |                  |                                |
| Demographics                | X          |                     |                 |                              |                               |                  |                                |
| Medical History             | X          |                     |                 | X                            | X                             | X                | X                              |
| Weight                      | X          | X <sup>11</sup>     |                 | X                            | X                             | X                | X                              |
| Vitals                      | X          | X <sup>11</sup>     |                 | X                            | X                             | X                | X                              |
| Physical Exam               | X          |                     |                 | X                            | X                             | X                | X                              |
| Con Meds                    | X          |                     |                 | X                            | X                             | X                | X                              |
| KPS                         | X          |                     |                 | X                            | X                             | X                | X                              |
| Baseline Symptoms           | X          |                     |                 |                              |                               |                  |                                |
| AE Assessment               | X          | X <sup>11</sup>     |                 | X                            | X                             | X                | X                              |
| CBC/diff                    | X          |                     |                 | X                            | X                             | X                |                                |
| CMP                         | X          |                     |                 | X                            | X                             | X                |                                |
| Urine P/C ratio             | X          |                     |                 |                              | X <sup>9</sup>                |                  |                                |
| PT/INR                      | X          |                     |                 |                              |                               |                  |                                |
| Pregnancy test <sup>8</sup> | X          |                     |                 |                              |                               |                  |                                |
| ECG                         | X          |                     |                 |                              |                               |                  |                                |
| MRI <sup>7</sup>            | X          |                     |                 |                              | X                             | X                |                                |
| Capecitabine                |            | X <sup>3</sup>      |                 | X                            | X                             |                  |                                |
| Bevacizumab                 |            |                     |                 |                              | X <sup>2</sup>                |                  |                                |
| Correlative Studies         |            | X <sup>4,5,12</sup> | X               | X <sup>4</sup>               | X <sup>4,6</sup>              |                  |                                |

1 – ± 3 days

2 – Days 1 and 15 (± 3 days)

3 – Capecitabine to start 5-7 days before surgery with last dose on morning of surgery

4 – Perform up to 3 days before starting chemotherapy

5 – Tissue studies on resected specimen

6 – Repeat through Cycle 6 and thereafter at the discretion of the investigator

7 – MRI to be done with gadolinium. Repeat MRI before (up to 5 days) even cycles beginning with Cycle 2. Perfusion MRI scanning will be done according to the discretion of the treating investigator.

8 – Only if not done pre-op and if child-bearing potential; serum or urine test allowed

9 – Omit test on Cycle 2, Day 1

10 – ± 2 weeks

11 – May be combined with Pre-study assessments

12 – Blood sample preoperatively on day of surgery

**Supplemental Figure 1**

**A**

| MDS panel |             |         |
|-----------|-------------|---------|
| Ab        | Fluorophore | cat #   |
| CD11b     | AF700       | CD11b29 |
| HLA-DR    | APC         | 559866  |
| CD14      | APC H7      | 560180  |
| CD15      | PerCP       | 555400  |
| CD33      | PE          | 555450  |

  

| T cell panel |             |        |
|--------------|-------------|--------|
| Ab           | Fluorophore | Cat #  |
| CD4          | PerPC       | 347324 |
| CD3          | 488         | 555332 |
| CD25         | PE          | 555432 |
| CD8          | PE cy7      | 557746 |
| CD107a       | APC-H7      | 561343 |
| cd127        | Af647       | 558598 |

**B**

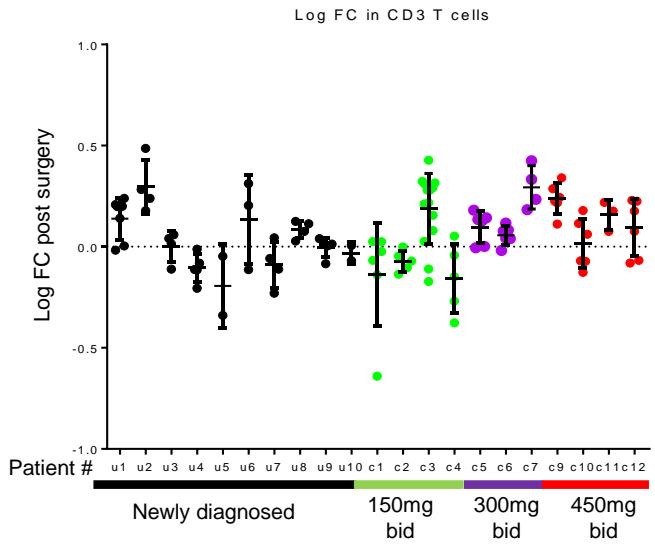

**C**

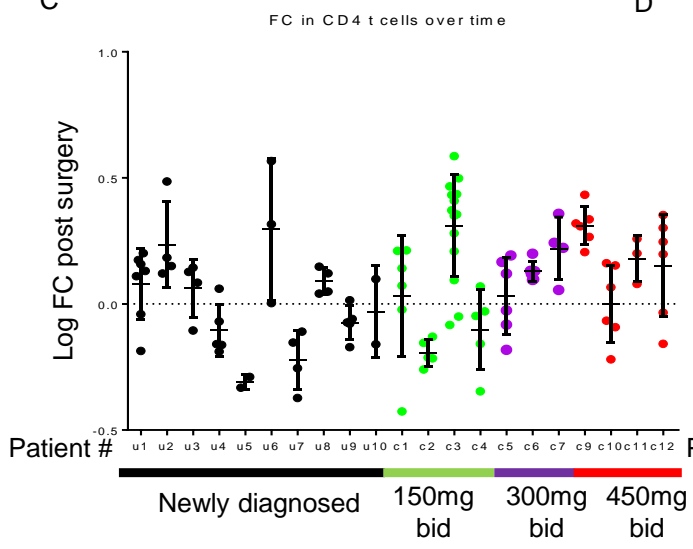

**D**

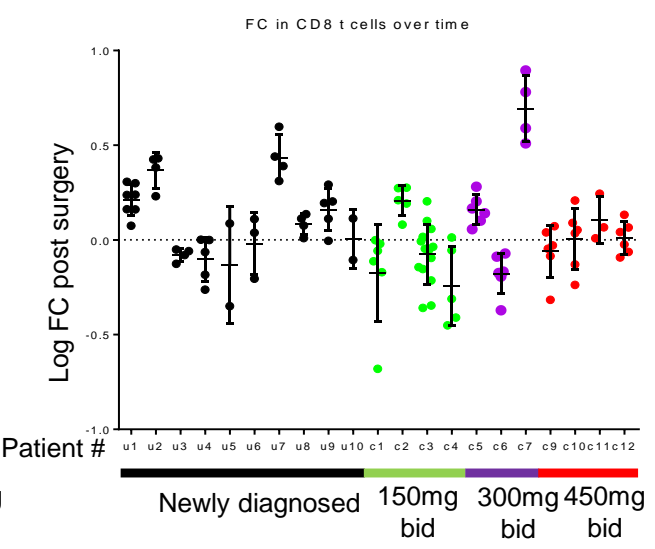

**E**

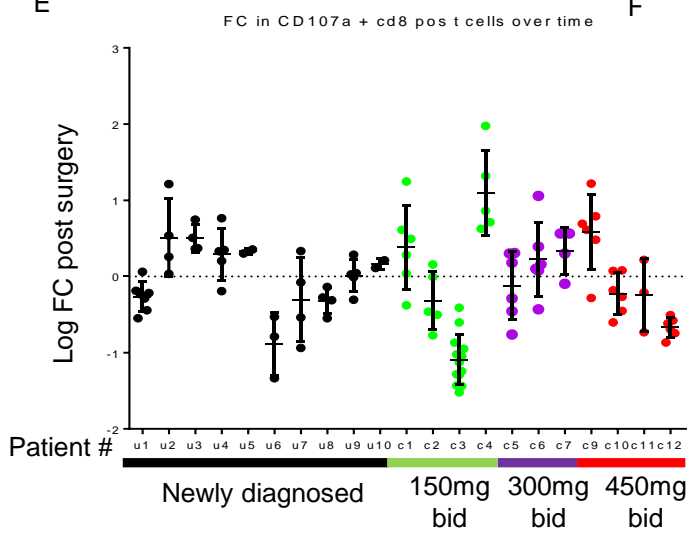

**F**

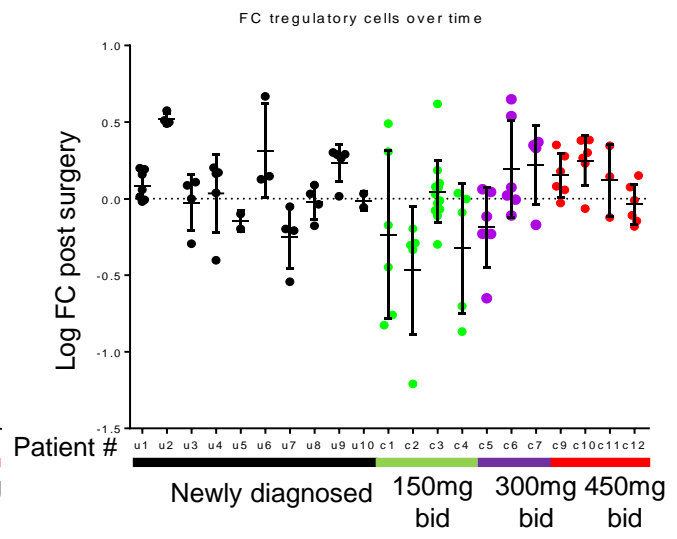

**Supplemental Figure 2**

**A**

| label | target         | Clone #    | Cat #    |
|-------|----------------|------------|----------|
| 209Bi | CD11b (Mac-1)  | ICRF44     | 3209003B |
| 170Er | CD3            | UCHT1      | 3170001B |
| 167Er | CD197 (CCR7)   | G043H7     | 3167009A |
| 165Ho | CD61           | VI-PL2     | 3165010B |
| 164Dy | CD15 (SSEA-1)  | W6D3       | 3164001B |
| 163Dy | CD56 (NCAM)    | NCAM16.2   | 3163007B |
| 146Nd | CD8a           | RPA-T8     | 3146001B |
| 159Tb | CD11c          | Bu15       | 3159001B |
| 158Gd | CD33           | WM53       | 3158001B |
| 169Tm | CD45RA         | HI100      | 3169008B |
| 89Y   | CD45           | HI30       | 3089003B |
| 153Eu | TIM-3          | F38-2E2    | 3153008B |
| 151Eu | CD123 (IL-3R)  | 6H6        | 3151001B |
| 150Nd | CD223 (LAG-3)  | 11C3C65    | 3150030B |
| 149Sm | CD66a          | CD66a-B1.1 | 3149008B |
| 148Nd | CD16           | 3G8        | 3148004B |
| 147Sm | CD20           | 2H7        | 3147001B |
| 145Nd | CD4            | RPA-T4     | 3145001B |
| 143Nd | CD25 (IL-2R)   | M-A251     | 555430   |
| 142Nd | CD19           | HIB19      | 3142001B |
| 139La | CD107a (LAMP1) | H4A3       | 328635   |
| 174Yb | HLA-DR         | L243       | 3174001B |
| 155Gd | CD279 (PD-1)   | EH12.2H7   | 3155009B |
| 176Yb | CD127 (IL-7Ra) | A019D5     | 3176004B |
| 160Gd | CD28           | CD28.2     | 3160003B |
| 161Dy | CD152 (CTLA-4) | 14D3       | 3161004B |
| 175Lu | CD14           | M5E2       | 3175015B |
| 171Yb | CD68           | Y1/82A     | 3171011B |

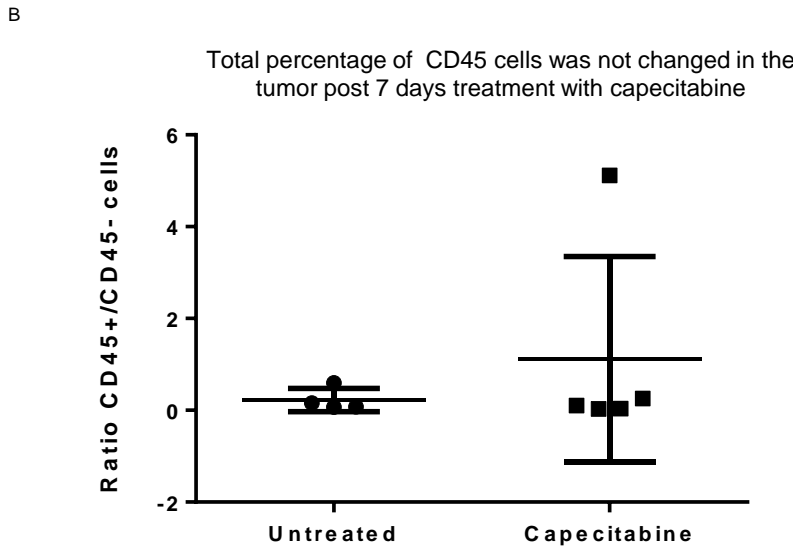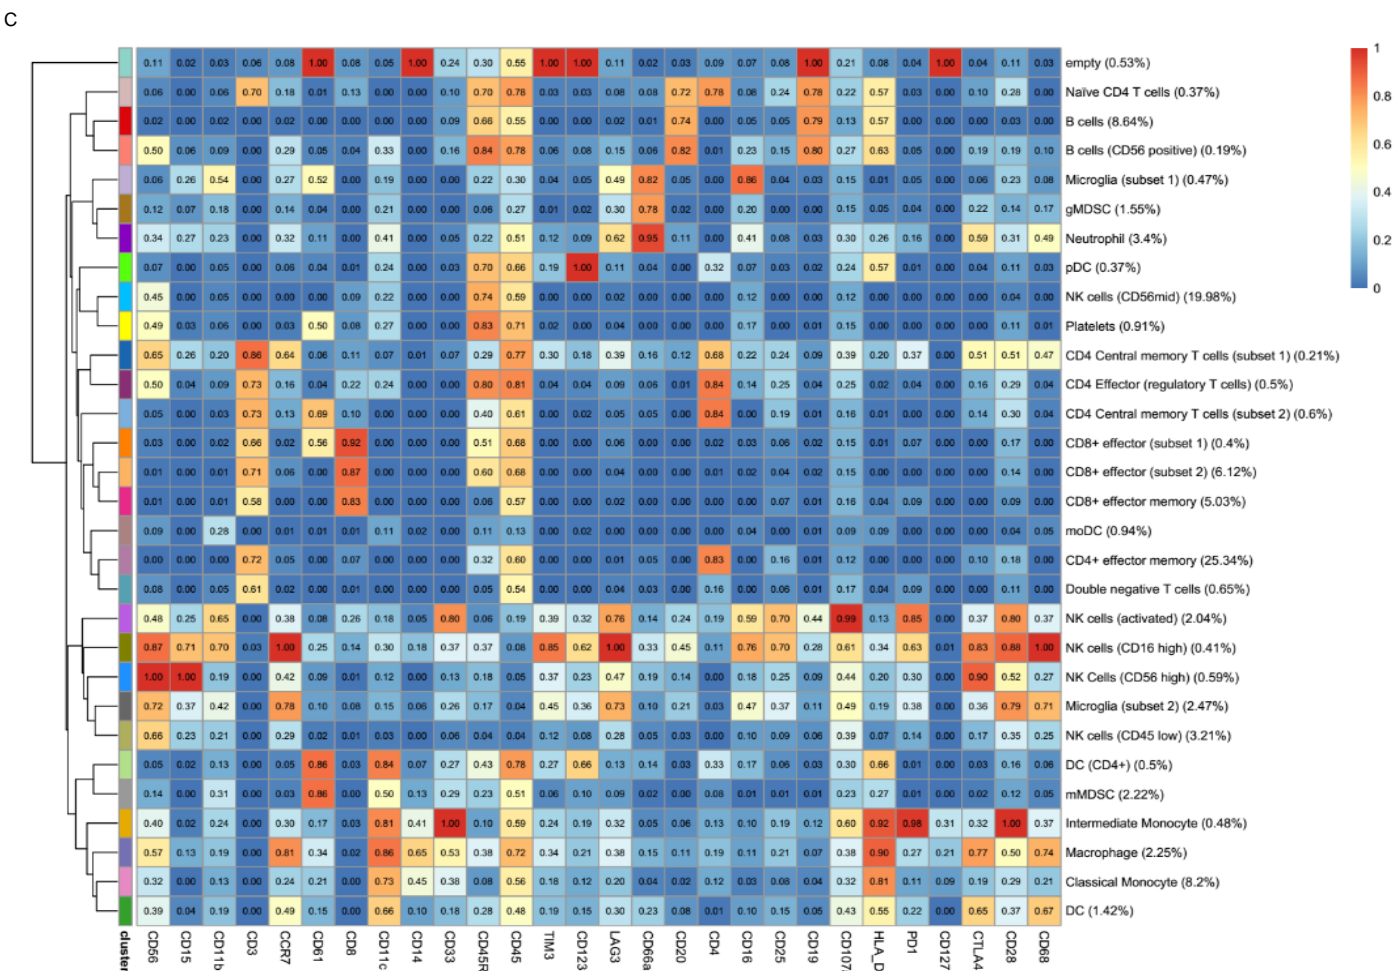

Supplemental Figure 3

A

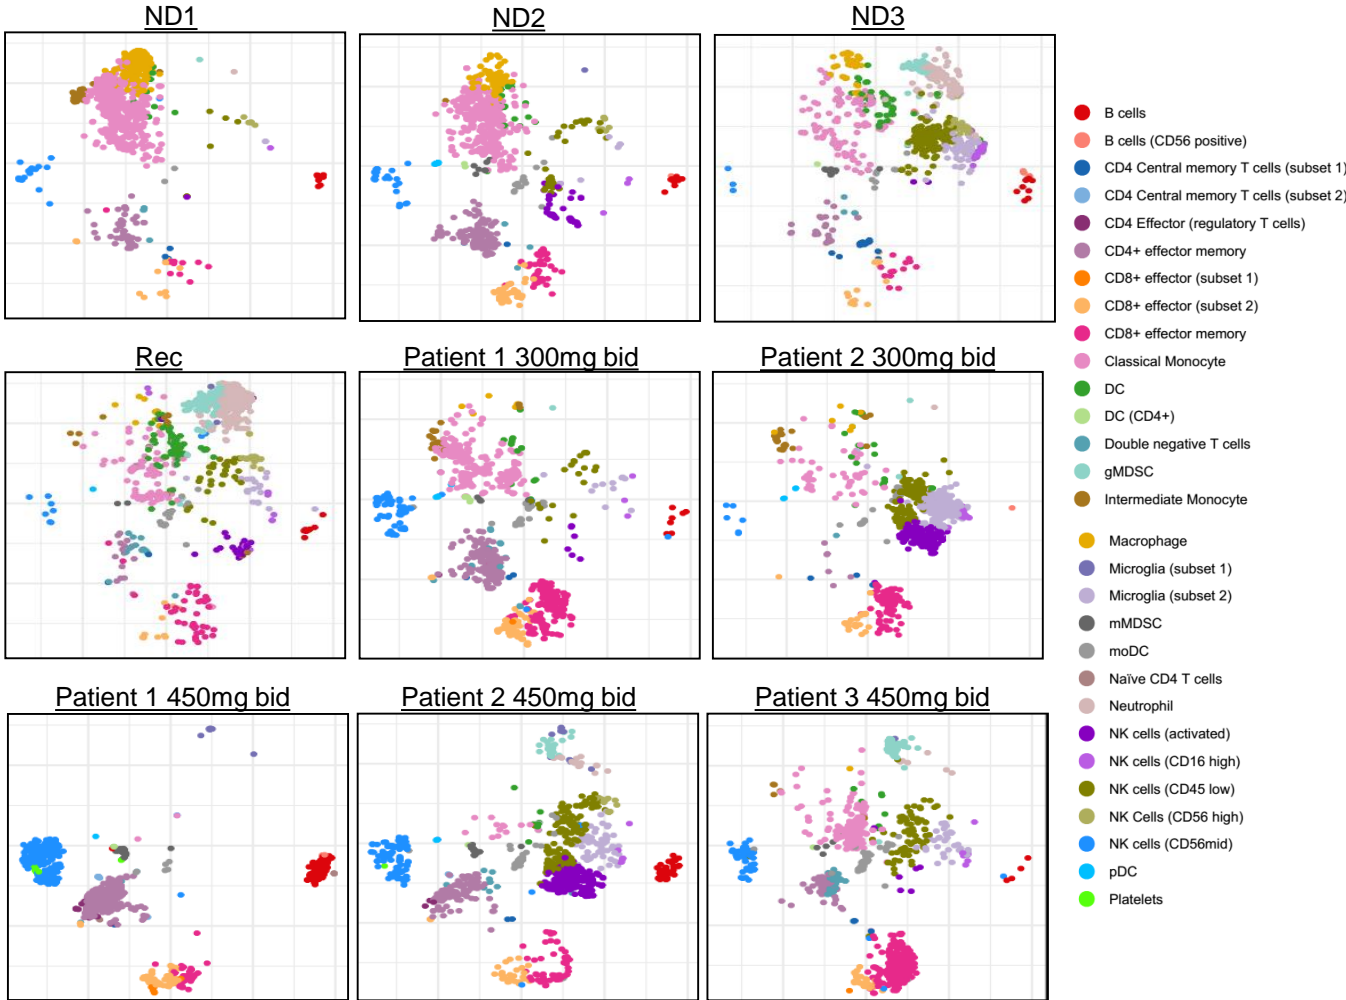

**Supplemental Figure 4**

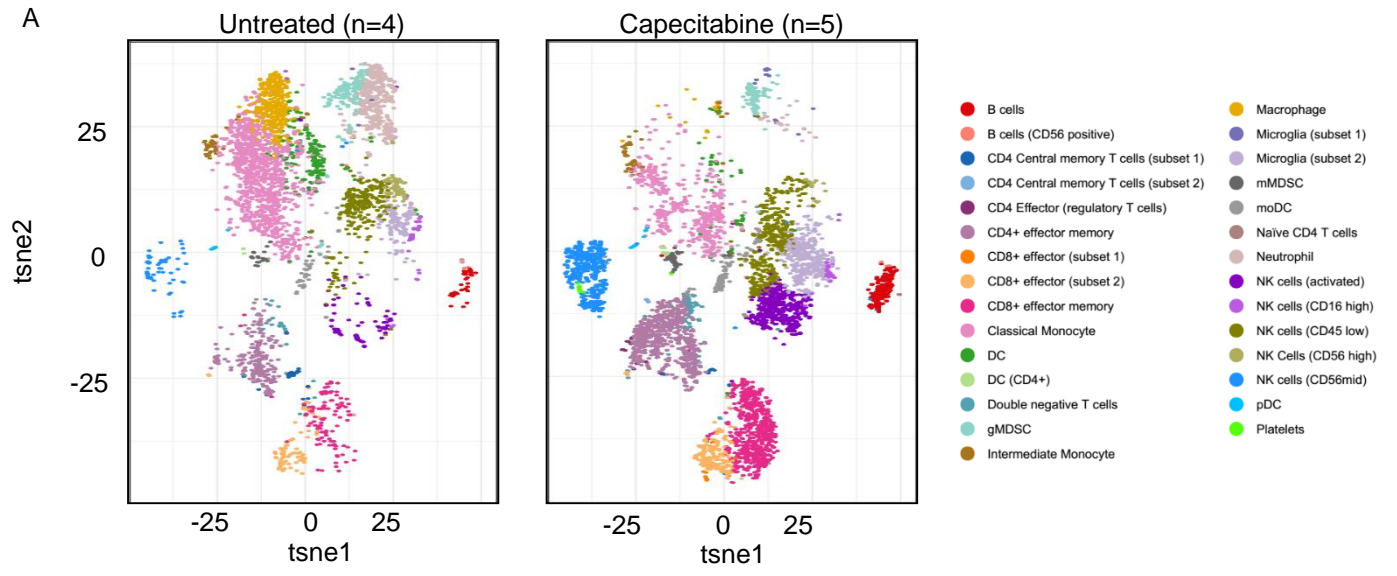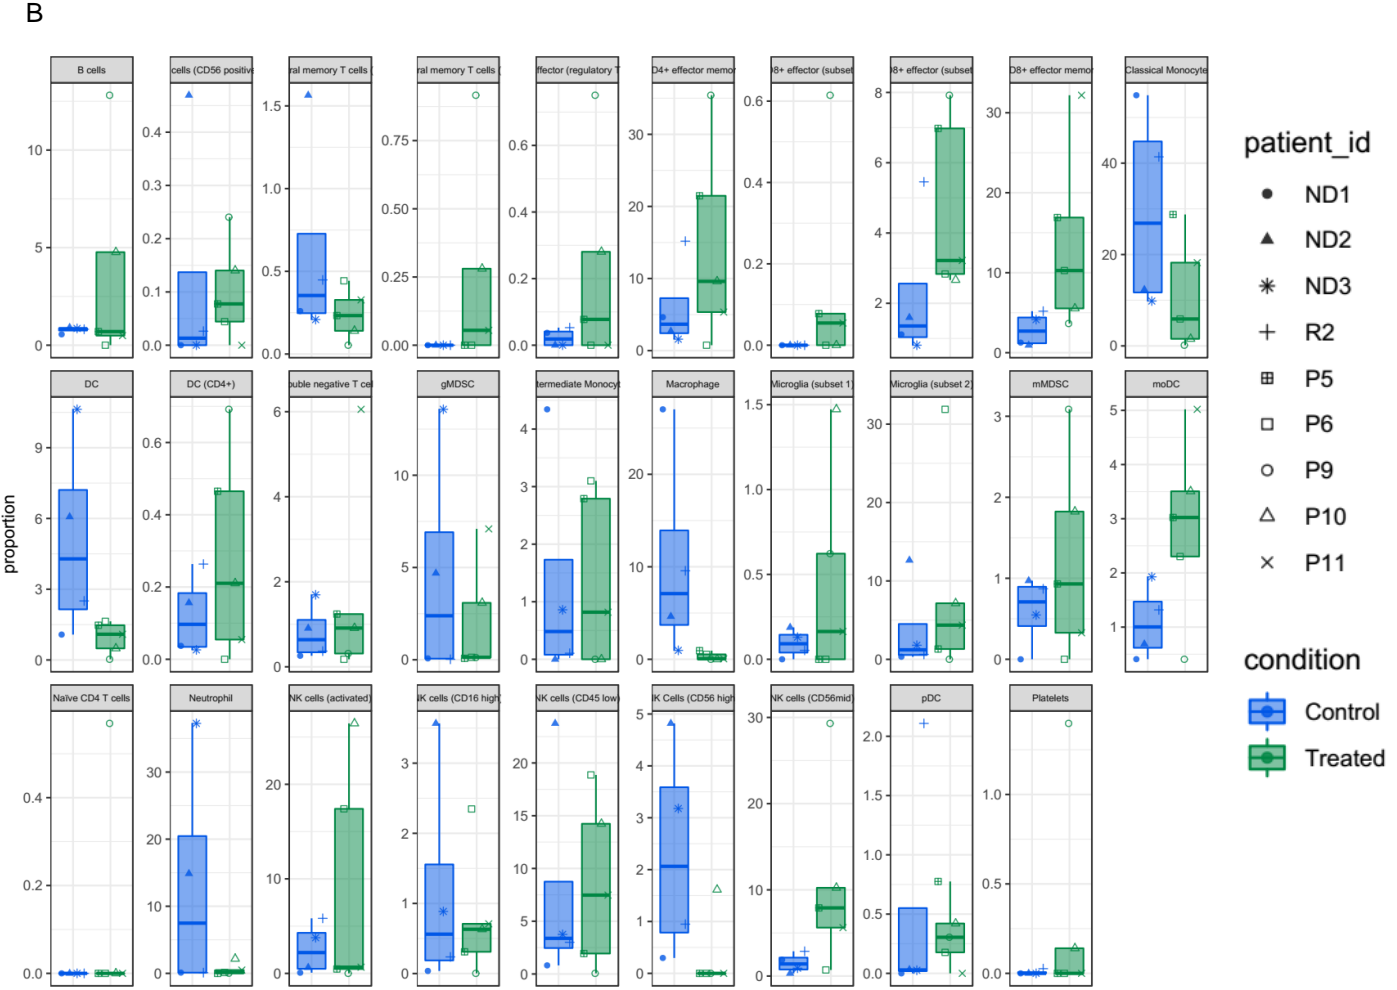

# Supplemental Figure 5

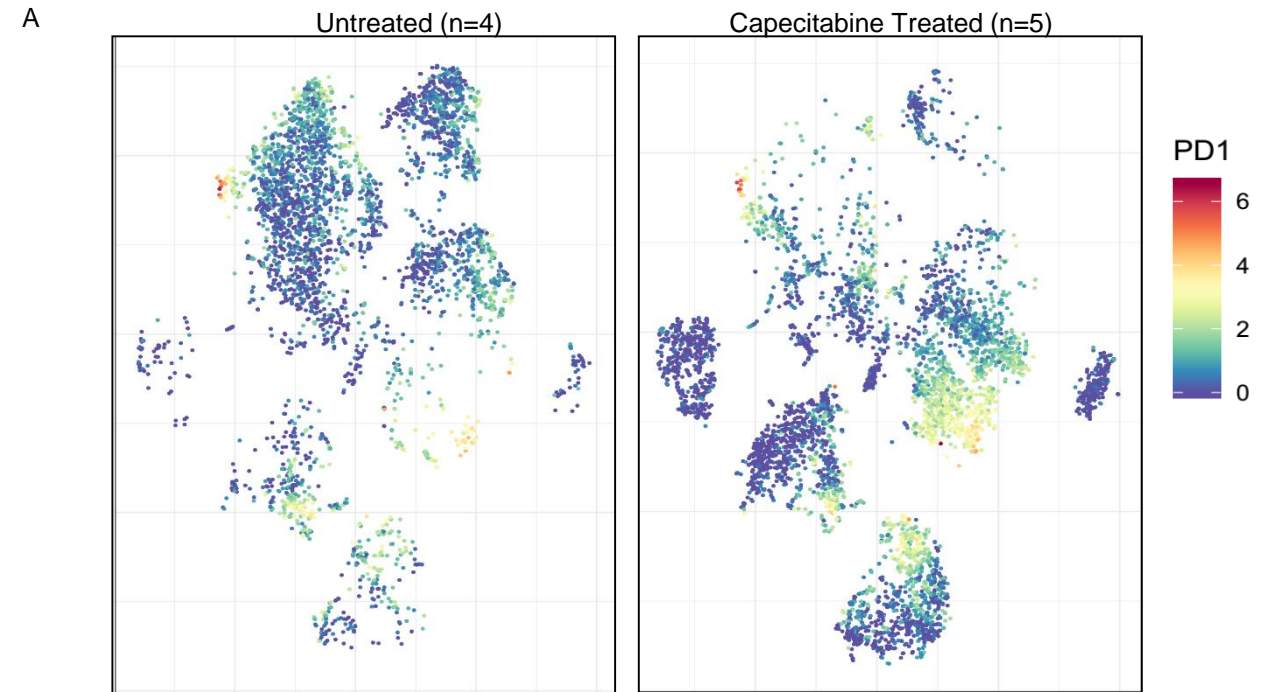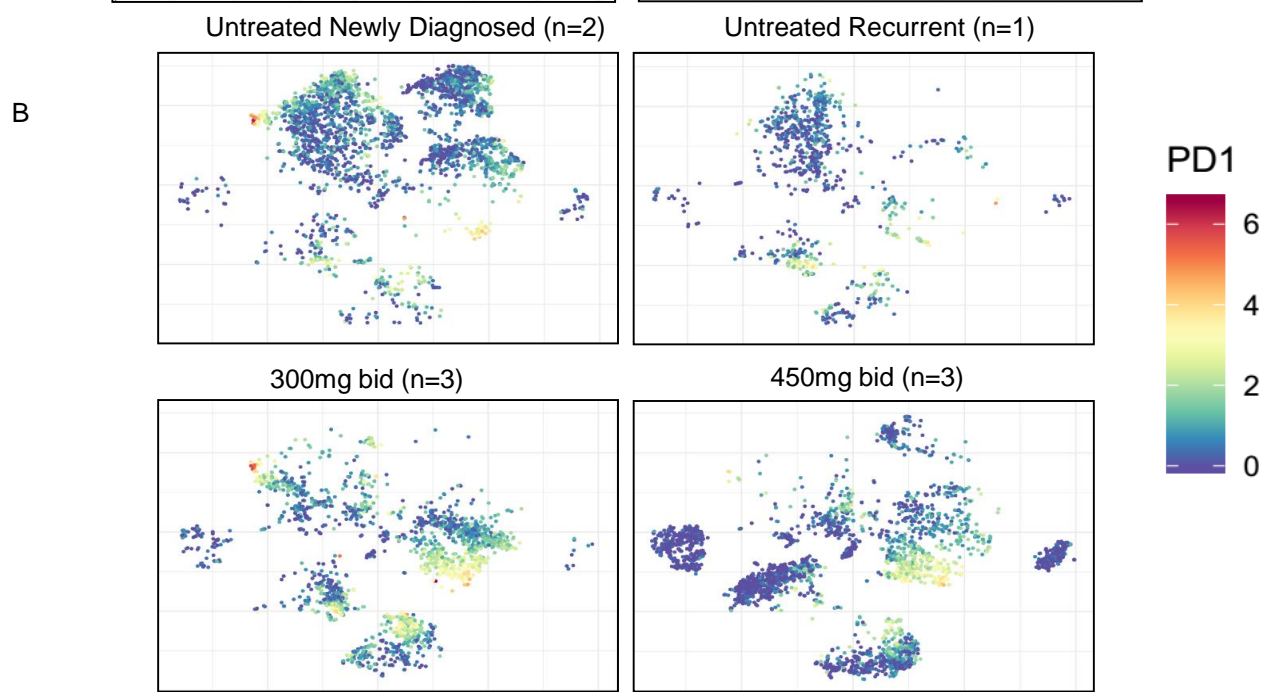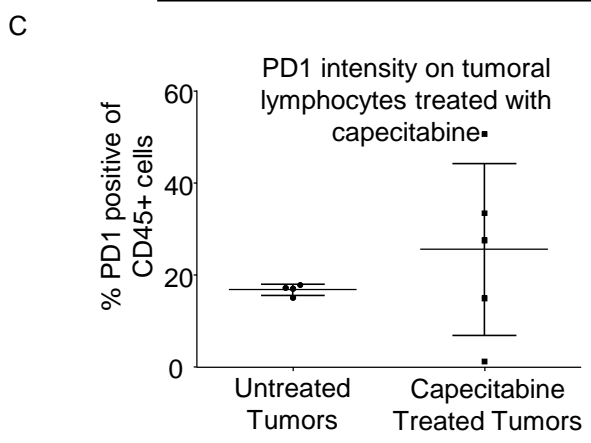

Supplemental Figure 6

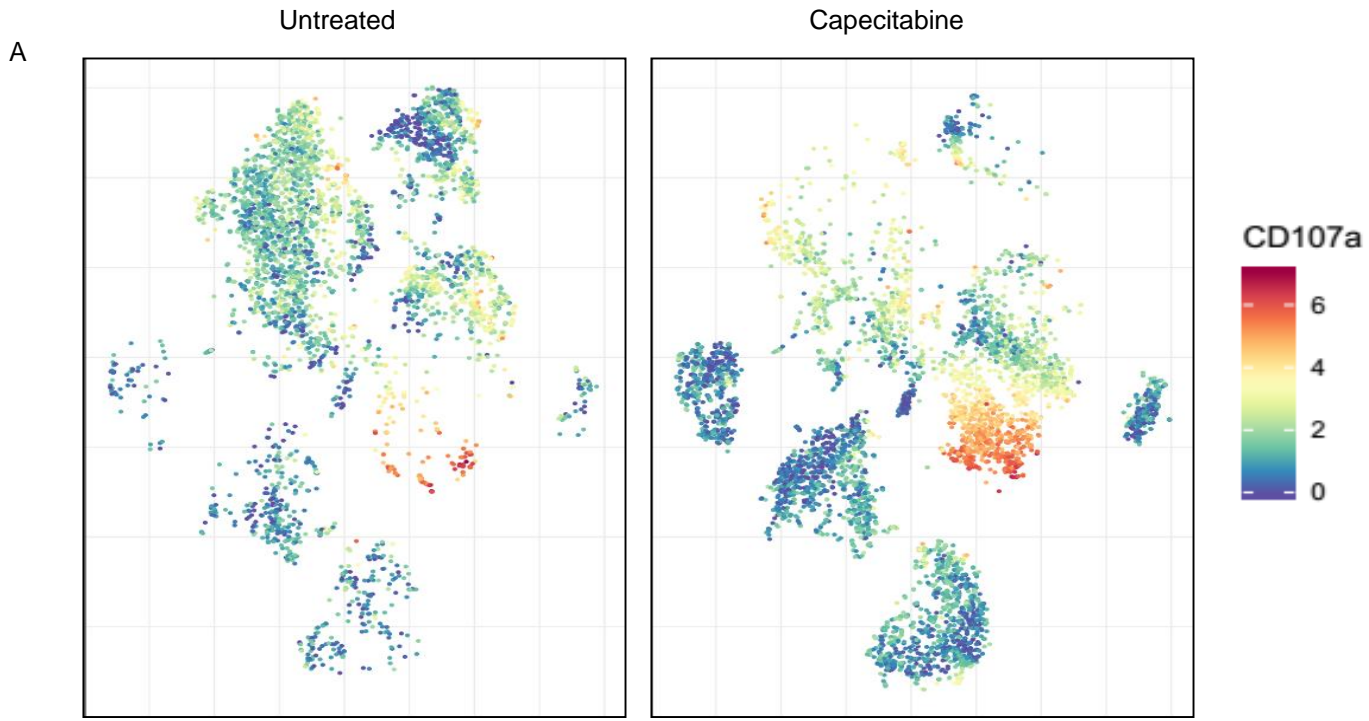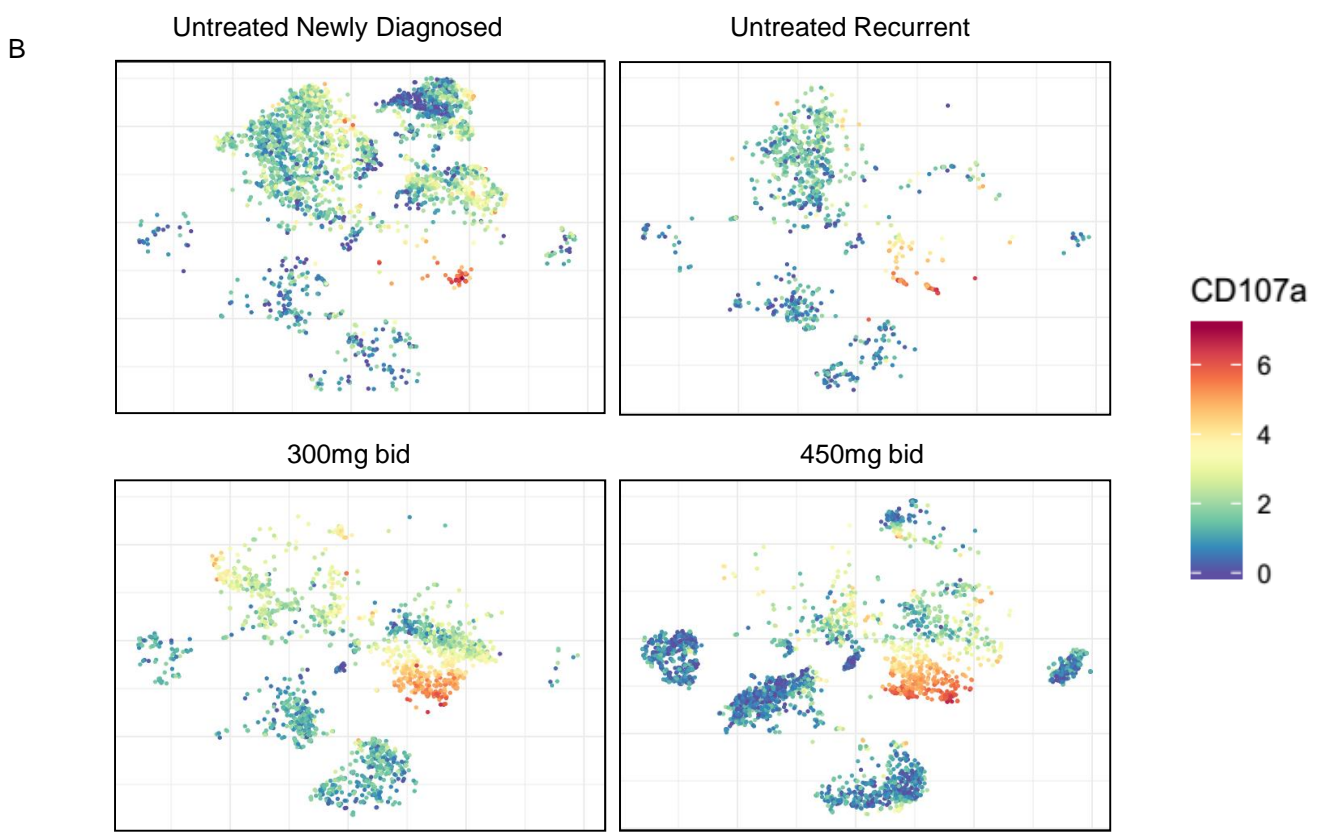



# Supplemental Figure 7

A

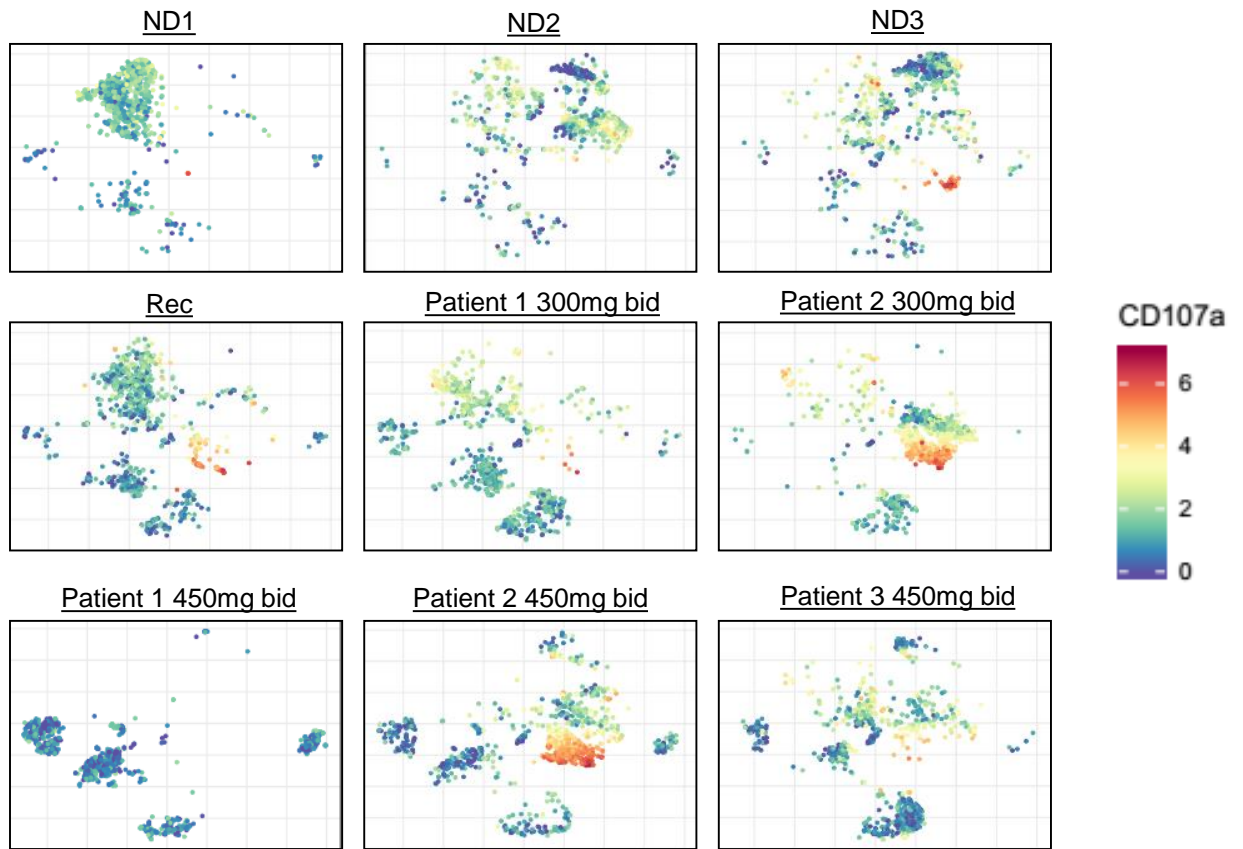

B

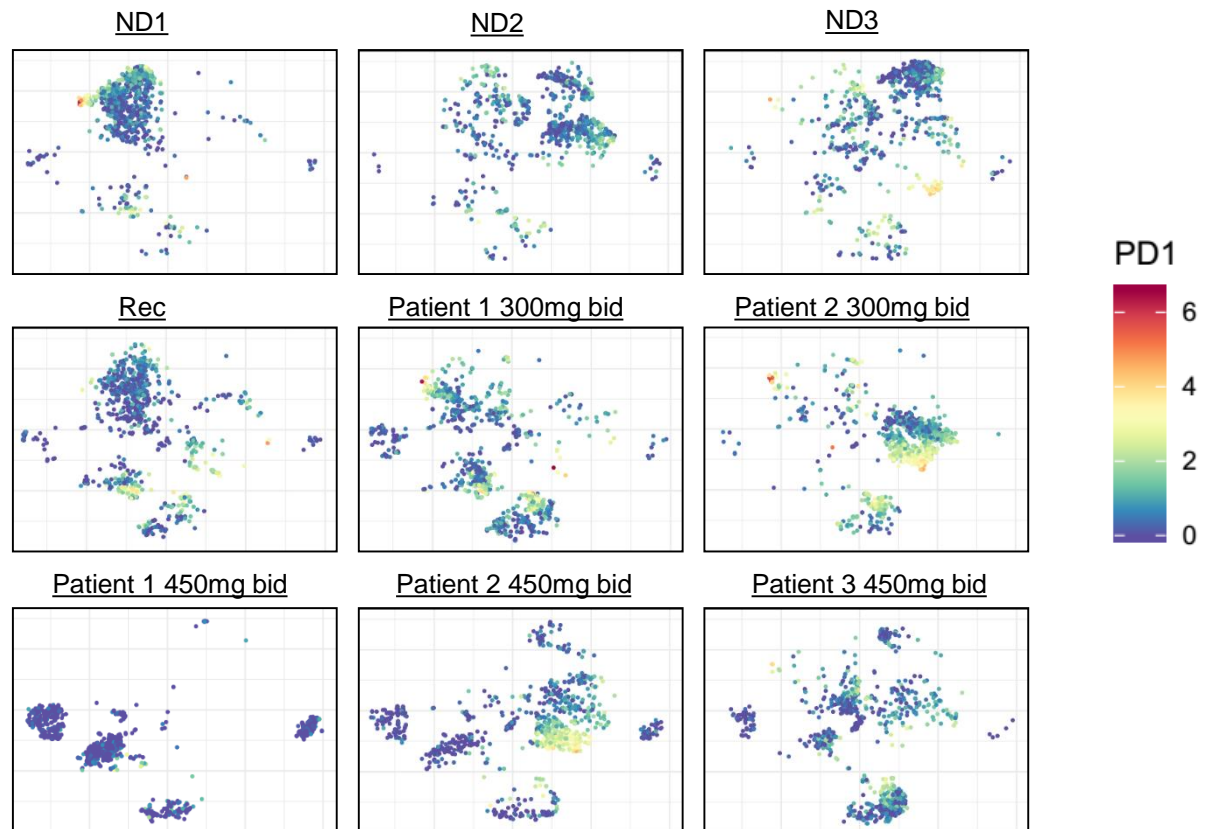

## Supplemental Table Descriptions

**Supplemental Table 1.** Detailed characteristics, including demographics, clinical and treatment parameters, and tumor-specific markers, of the 11 evaluable patients.

**Supplemental Table 2.** Study calendar detailing the required assessments and their respective acquisition time points

## Supplemental Figure Legends

**Supplemental Figure 1.** Post-surgical resection, the circulating T cell populations did not change compared to controls in response to capecitabine treatment. Flow cytometry was performed on PBMC samples collected using two flow cytometry panels (MDSC panel, and T cell panel) (**A**). Log fold change in total CD3+ T cells from surgical resection over time showing a newly diagnosed cohort of patients not treated with capecitabine (**B**). (CD3+, CD4+) CD4+ T cells, (CD3+, CD8+) T cells, (CD3+, CD8+, CD107a+) cytotoxic T cells, and (CD3+, CD4+, CD127-, CD25+) T regulatory cells were also analyzed over time in each patient, demonstrating no trend upon capecitabine treatment in any of these lymphocyte populations (**C-F**).

**Supplemental Figure 2.** CyTOF immune panel analysis. CyTOF analysis utilized an immune panel consisting of the immune markers listed in (**A**). The CyTOF was performed on whole dissociated tumor samples, with an initial step of separating CD45+ cells from CD45- cells. The total number of CD45+ cells was not different between the untreated and capecitabine-treated patients (**B**). Unbiased clustering was used to identify the following immune populations by heatmap analysis for each marker of the panel (**C**). All error bars represent the standard deviation. Unpaired student's t-test was used for all comparisons, where \*p < 0.05, \*\*p < 0.01, \*\*\*p < 0.001.

**Supplemental Figure 3.** CyTOF comparison of capecitabine-treated vs untreated patients. Comparison of treated (n=5) vs control samples (n=4) samples represented as a tSNE plot (**A**). The various immune population names are denoted to the right in the figure key. Graphical representation of treated vs untreated patients with each of the 29 immune populations identified (**B**).

**Supplemental Figure 4.** Multidimensional plots of immune populations from individual patients (**A**). Individual population color key is located to the right of the figures.

**Supplemental Figure 5.** PD-1 levels of untreated and treated patients were compared using tSNE multidimensional plots, with PD-1 expression levels colored according to the key to the right of the figure (**A**). Subdividing the tSNE plots of treated and untreated patients for PD-1 levels of newly diagnosed patients, recurrent patients, 300 mg bid capecitabine, and 450 mg bid capecitabine (**B**). Quantification of PD-1+ cells of the CD45+ lymphocytes did not identify any significant differences between untreated and treated tumor samples.

**Supplemental Figure 6.** CD107a levels of untreated and treated patients were compared using tSNE multidimensional plots, with CD107a expression levels colored according to the key to the right of the figure (**A**). Subdividing the tSNE plots of treated and untreated patients for CD107a levels for newly diagnosed patients, recurrent patient, 300 mg bid capecitabine, and 450 mg bid capecitabine (**B**).

**Supplemental Figure 7.** CD107a and PD-1 levels are depicted using individual patient-based tSNE plots (**A, B**).
